# Supplementary material for: Increasing Trend and Characteristics of Korean Adolescents Presenting to Emergency Department for Self-Harm: A 5-Year Experience, 2015 to 2019
Source: PubMed Central journal article supplement — Yonsei Med J. 2020 Jun 26;61(7):614–22. doi: 10.3349/ymj.2020.61.7.614 (PMC7329735; doi:10.3349/ymj.2020.61.7.614), 2020-06-26
Supplement: ymj-61-614-s001.pdf [file ymj-61-614-s001.pdf]

**Supplementary Table 1.** Comorbid Diagnosis of Adolescent Self-Harm Patients in the Emergency Department

| <b>Reason for ER visits</b> | <b>Suicidal ideation only OR preparatory act</b> | <b>Suicidal attempt</b> | <b>Self-harm (no suicidal intent)</b> |
|-----------------------------|--------------------------------------------------|-------------------------|---------------------------------------|
| Number of episodes          | 76                                               | 117                     | 111                                   |
| Comorbid diagnosis (%)*     |                                                  |                         |                                       |
| ASD                         | 2 (2.6)                                          | 4 (3.4)                 | 2 (1.8)                               |
| ADHD                        | 7 (9.2)                                          | 2 (1.7)                 | 6 (5.4)                               |
| BIF                         | 0                                                | 1 (0.9)                 | 1 (0.9)                               |
| TLE                         | 0                                                | 1 (0.9)                 | 0                                     |
| ODD or CD                   | 0                                                | 0                       | 2 (1.8)                               |

ASD, autism-spectrum disorder; ADHD, attention deficit hyperactivity disorder; BIF, borderline intellectual functioning; TLE, temporal lobe epilepsy; ODD, oppositional defiant disorder; CD, conduct disorder.

\*Multiple choices were allowed.
