# Supplementary material for: Increasing Trend and Characteristics of Korean Adolescents Presenting to Emergency Department for Self-Harm: A 5-Year Experience, 2015 to 2019
Source: PubMed Central journal article supplement — Yonsei Med J. 2020 Jun 26;61(7):614–22. doi: 10.3349/ymj.2020.61.7.614 (PMC7329735; doi:10.3349/ymj.2020.61.7.614), 2020-06-26
Supplement: ymj-61-614-s002.pdf [file ymj-61-614-s002.pdf]

**Supplementary Table 2.** Comparisons of Substance for Self-Poisoning

|                         | <b>Suicidal attempt<br/>(n=66)</b> | <b>Self-harm<br/>(no suicidal intent)<br/>(n=52)</b> |
|-------------------------|------------------------------------|------------------------------------------------------|
| Substance (%)*          |                                    |                                                      |
| Acetaminophen           | 19 (28.8)                          | 11 (21.2)                                            |
| Ibuprofen               | 4 (6.0)                            | 11 (21.2)                                            |
| Antidepressant          | 14 (21.2)                          | 9 (17.3)                                             |
| Benzodiazepine          | 18 (27.2)                          | 9 (17.3)                                             |
| Antipsychotics          | 13 (19.7)                          | 9 (17.3)                                             |
| Mood stabilizer         | 2 (3.0)                            | 0                                                    |
| Propranolol             | 5 (7.6)                            | 2 (3.8)                                              |
| Other drugs prescribed  | 1 (1.5)                            | 3 (5.8)                                              |
| Chemicals               | 3 (4.5)                            | 0                                                    |
| Etc.                    | 6 (9.1)                            | 10 (19.2)                                            |
| Unknown                 | 4 (6.0)                            | 0                                                    |
| Source of substance (%) |                                    |                                                      |
| OTC                     | 26 (39.4)                          | 27 (51.9)                                            |
| Family member           | 5 (7.6)                            | 2 (3.8)                                              |
| Prescription of doctor  | 28 (42.4)                          | 22 (42.3)                                            |
| Unknown                 | 9 (13.6)                           | 1 (1.9)                                              |

OTC, over-the-counter medication.

\*Multiple choices were allowed.
